RESEARCH ARTICLE

# Risk factors for COVID-19 infections among health care workers in Ghana

Margaret Lartey<sup>1,2</sup>, Ernest Kenu<sup>3</sup>, Vincent Jessey Ganu<sup>2\*</sup>, Franklin Asiedu-Bekoe<sup>4</sup>, Baafour Kofi Opoku<sup>5</sup>, Alfred Yawson<sup>6</sup>, Sally-Ann Ohene<sup>7</sup>

**1** Department of Medicine and Therapeutics, University of Ghana Medical School, College of Health Sciences, University of Ghana, Accra, Ghana, **2** Department of Medicine, Korle Bu Teaching Hospital, Accra, Ghana, **3** Department of Epidemiology and Disease Control, School of Public Health, University of Ghana, Accra, Ghana, **4** Public Health Directorate, Ghana Health Service, Accra, Ghana, **5** Komfo Anokye Teaching Hospital, Kumasi, Ghana, **6** Department of Community Health, University of Ghana Medical School, College of Health Sciences, University of Ghana, Accra, Ghana, **7** World Health Organization, Accra, Ghana

\* [vincentjganu@gmail.com](mailto:vincentjganu@gmail.com)

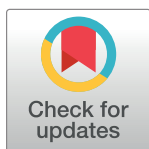

## Abstract

### Introduction

Health care workers (HCWs) are crucial to the fight against COVID-19 and are at risk of being infected. We sought to determine the risk factors and associations of COVID-19 among HCWs in Ghana during the period of the pandemic.

### Materials and methods

A case-control study was conducted using the WHO COVID-19 HCWs exposure risk assessment tool. A HCW was categorized as “*high risk*” for COVID-19 if s/he did not respond “always, as recommended” to adherence to Infection Prevention and Control (IPC) measures during a healthcare interaction. A HCW was categorized as “*low risk*” if s/he responded “always, as recommended” to adherence to IPC measures. We used univariate and multiple logistic regression models to determine associated risk factors. Statistical significance was set at 5%.

### Results

A total of 2402 HCWs were recruited and the mean age was 33.2±7.1 years. Almost 87% (1525/1745) of HCWs had high risk for COVID-19 infection. Risk factors identified were profession (doctor- aOR: 2.13, 95%CI: 1.54–2.94; radiographer—aOR: 1.16, 95% CI: 0.44–3.09), presence of comorbidity (aOR: 1.89, 95%CI: 1.29–2.78), community exposure to virus (aOR: 1.26, 95% CI: 1.03–1.55), not performing hand hygiene before and after aseptic procedures performed (aOR: 1.6, 95% CI: 1.05–2.45); not frequently decontaminating high-touch surfaces always as recommended (aOR: 2.31, 95%CI: 1.65–3.22; p = 0.001) and contact with a confirmed COVID-19 patient (aOR: 1.39, 95% CI: 1.15–1.67). Among those who came into any form of contact with confirmed COVID-19 patient, providing direct care (aOR: 2.0, 95%CI: 1.36–2.94), face-to-face contact (aOR: 2.23, 95%CI: 1.41–3.51), contact with environment/materials used by COVID-19 patient (aOR: 2.25, 95%CI: 1.45–3.49) and

## OPEN ACCESS

**Citation:** Lartey M, Kenu E, Ganu VJ, Asiedu-Bekoe F, Opoku BK, Yawson A, et al. (2023) Risk factors for COVID-19 infections among health care workers in Ghana. PLoS ONE 18(7): e0288242. <https://doi.org/10.1371/journal.pone.0288242>

**Editor:** Stephen Dajaan Dubik, University for Development Studies, GHANA

**Received:** October 5, 2022

**Accepted:** June 22, 2023

**Published:** July 6, 2023

**Copyright:** © 2023 Lartey et al. This is an open access article distributed under the terms of the [Creative Commons Attribution License](https://creativecommons.org/licenses/by/4.0/), which permits unrestricted use, distribution, and reproduction in any medium, provided the original author and source are credited.

**Data Availability Statement:** All relevant data are within the manuscript and its [Supporting Information](#) files.

**Funding:** ML received support from the World Health Organization (WHO) Ghana Office. Number HSE.50. The funders had no role in study design, data collection and analysis, decision to publish, or preparation of the manuscript.

**Competing interests:** The authors have declared that no competing interests exist.

presence during conduct of aerosol generating procedures (aOR: 2.73, 95%CI: 1.74–4.28) were associated with COVID-19 infection.

## Conclusion

Non-adherence to IPC guidelines puts HCWs at increased risk of COVID-19 infection thus ensuring IPC adherence is key to reducing this risk.

## Introduction

The Corona virus SARS-Cov-2, disease (COVID-19) continues to be a public health emergency since January 2020 [1]. Africa recorded its first case in February 2020 [2] with Nigeria reporting the first COVID-19 case in Sub-Saharan Africa [3]. Globally, as at the 7th June 2023, there have been 767,364,883 confirmed cases of COVID-19 with Africa recording 1.2% (9,532,788) of these cases [4]. The total reported deaths worldwide at the same time was 6,938,353 with Africa recording 2.5% (175,371) of these deaths. Ghana reported its first COVID-19 case on the 12th March 2020 and as at the 7th June 2023, it had 171,653 cases of COVID-19 with 1462 deaths [4].

The African region experienced the third wave of the COVID-19 infection over the period of June to August 2021 with seven countries then were still undergoing a resurgence [5]. Health care worker (HCW) infections continue to be reported and this is a concern as it imposes undue stress on the capacity of health system to respond to the disease [6], thus their personal safety needs to be ensured [7]. There have been several reports of COVID-19 infections among HCWs involved in clinical care [8–11]. The African continent had recorded 116,457 COVID-19 infections among HCWs as at 8<sup>th</sup> August 2021 with South Africa accounting for 48% of these infections [5] arising from the first and second waves. But this increased to a total of 150,387 COVID-19 infections among HCWs in Africa as at 16<sup>th</sup> January, 2022 with Tanzania (11%), Algeria (5.3%), Liberia (5.0%), Chad (5.0%) and Niger (4.2%) having the highest proportion of HCW infections by country at the time [12]. Ghana is one of the countries with high numbers of HCW COVID-19 infections and had reported 4763 HCW infections as at 16<sup>th</sup> January, 2022 [12]. Only Eritrea had not reported any HCW infections. There have also been reports of deaths among HCWs from COVID-19 infection from China, Italy, Spain, USA and the United Kingdom [13–16].

The implementation of infection prevention and control (IPC) practices is very important regarding protection of HCWs from being infected [17, 18]. However, the lack or deficiency of personal protective equipment (PPE) in many clinical settings increases the risk of infections among these HCWs [11, 19]. Lack of implementation of IPC, inadequate personal protection of healthcare workers, pressure of treatment, work intensity and lack of rest have all been attributable factors to the risk of infection among HCWs [20]. No significant difference has been found with regards to the attack rate of COVID-19 infection among clinical and non-clinical HCWs [10].

There is little data on the epidemiology of COVID-19 infections among HCWs in Ghana.

A recently published study by Opoku et al. reported PPE use of 59.5% among HCWs in one region in Ghana [21]. Years of practice experience, type of health facility and adherence to IPC when in contact with patients were risk factors identified in the study [21]. A nationally representative study exploring epidemiological characteristics of COVID-19 infection among HCWs is useful in providing additional relevant information for policy and decision making.

This study was therefore undertaken among HCWs in three regions in Ghana representing high, medium and low COVID-19 burden zones in Ghana to examine the epidemiological characteristics, risk factors and associated factors of COVID-19 infection.

## Materials and methods

### Study design and sites

A 1:1 case-control study was conducted in three regions (Ashanti, Western and Northern) representing high, medium and low burden zones in Ghana from 1<sup>st</sup> November 2020 to 31<sup>st</sup> January 2021.

### Study population

The study population was all HCWs actively providing healthcare services in the three selected regions who had received a test for COVID-19 with evidence of test results from any of the accredited COVID-19 test laboratories in Ghana and reported to the National database. For this study, health care workers (HCWs) were defined as all persons engaged in actions in the health facility with a primary intent to enhance health as defined by the WHO [22].

### Definitions

**Case.** Any health care worker with laboratory confirmed COVID-19 infection who worked in any health facility in Ghana from 12th March 2020 to 31st August 2020 was defined as a case.

**Control.** Any health worker with negative laboratory COVID-19 results who worked in any health facility in Ghana from 12th March 2020 to 31st August 2020 was defined as a control.

### Sample size and sampling procedure

A multi-stage sampling approach was used. The country was stratified into three zone High, Medium and low burden zones. This was based on the number of HCW cases recorded per region (high burden— $\geq 600$  HCW cases; medium burden—300–599; low burden— $\leq 299$ ). For each zone, a simple random sampling was conducted to select one region per zone resulting in the selection of Ashanti region (High burden zone), Western region (Medium burden zone) and Northern region (Low burden zone).

A list of all HCWs tested for COVID-19 at all testing centers for the three regions and reported to the national database was obtained and reviewed. A sample of records for 1000 HCW cases was used based on the WHO recommendation [23]. The same number of controls was selected. A proportionate to size ratio of 0.6:0.3:0.1 for the high, medium and low burden regions respectively was used (See Table 1). In each selected region, we used generated random numbers to select the required sample size from the database of COVID-19 positive health care workers for that region. For each selected case, a HCW control matched by facility was selected from the same database who had tested negative for COVID-19.

**Table 1. Distribution of sample sizes per area of burden for healthcare workers in Ghana, 2020.**

| Burden       | Percentage | Sample size (cases) | Sample size (controls) |
|--------------|------------|---------------------|------------------------|
| High         | 60         | 600                 | 600                    |
| Medium       | 30         | 300                 | 300                    |
| Low          | 10         | 100                 | 100                    |
| <b>Total</b> | 100        | 1000                | 1000                   |

<https://doi.org/10.1371/journal.pone.0288242.t001>

Each selected health worker case or control was contacted via phone by the research team and informed of the study. Arrangements for in-person meeting were made with those who agreed to participate in the study. Those declining were replaced with the next selected participant. Each participant provided a signed written informed consent before participating in the study.

## Data collection and tools

A structured data extraction form and the WHO COVID-19 health care workers exposure risk assessment tool [24] were used for this study.

Data obtained using the extraction form included patients' socio-demographic variables (such as age, sex, marital status, level of education and profession), place of work, location of work, role at workplace, role in service provision, treatment received and clinical outcomes (discharged with or without disability).

The WHO COVID-19 health care workers exposure risk assessment tool [24] assesses community (2 items) and occupational/health system related exposure (5 items) to the COVID-19 virus; adherence to IPC during healthcare interactions (7 items); adherence to IPC when performing aerosol generating procedures (AGP) (6 items); accident with biological materials (1 item) and also risk categorization of HCWs.

The data was collected through questionnaire administration and all national COVID-19 protocols were strictly adhered to during the data collection period.

**Community exposure.** A HCW was considered to have community exposure to the COVID-19 virus if he or she responded "yes" to either having had any history of staying in the same household or classroom environment with a confirmed COVID-19 patient or had a history of traveling together in close proximity (within 1 meter) with a confirmed COVID-19 patient in any kind of conveyance.

**Occupational/health system related exposure.** A HCW was considered to have occupational/health system related exposure to the COVID-19 virus if he or she responded "yes" to having performed any of the following activities in the facility: direct care to a confirmed COVID-19 patient or the environment where the patient was cared for; face-to-face contact (within 1 meter) with a confirmed COVID-19; present when any procedure was performed on a patient, and involvement with healthcare interaction (paid or unpaid) in another facility.

**Risk categorization.** HCWs were categorized as "high risk" or "low risk" for COVID-19 virus infection. A HCW was categorized as "high risk" if he or she did not respond "always, as recommended" to adherence to IPC measures/protocols during a healthcare interaction with regards to the use, removal, and replacement of Personal Protective Equipment (PPE), performing hand hygiene and decontaminating high touch surfaces at least three times daily and also having any episode of accident with biological fluid/respiratory secretions. A HCW was categorized as "low risk" if he or she responded "always, as recommended" to adherence to IPC measures/protocols during a healthcare interaction with regards to the use, removal, and replacement of Personal Protective Equipment (PPE), performing hand hygiene and decontaminating high touch surfaces at least three times daily.

## Data analysis

Data was entered and cleaned in Microsoft Excel before it was exported into STATA version 15.0 (StataCorp LP, College Station, Texas, USA) for analysis. Descriptive analysis of categorical variables was presented in the form of frequencies and percentages as well as graphically using bar charts, pie charts and doughnut pie charts. The summary of age of HCWs was done with means and standard deviation.

Associations between host related, community exposure, health system/occupational-related risks and the outcome variables (COVID-19 infection and clinical outcome) was carried out using unadjusted and adjusted multiple logistic regression models. The crude odds ratio was computed for the identified host, health system and environment-related risk factors. The adjusted odds ratio for the different categories of risk factors were determined using the logistic regression model. Statistical significance was set at 5%.

## Ethical approval

Ethical approval was obtained from the Ghana Health Service Ethics Review Committee (ID GHS-ERC 008/06/20) and the Komfo Anokye Teaching Hospital Institutional Review Board (KATH-IRB/AP/142/20).

## Results

### Socio-demographic and clinical characteristics of HCWs

A total of 2402 HCWs from the three regions (Ashanti– 59.0%, Western– 32.7%, Northern– 8.3%) in Ghana participated in the study. The ratio of persons with COVID-19 infection (1201 cases) to non-COVID-19 infected health workers (1201 controls).

Majority (59.0%, 1418/2402) of the HCWs were females and the mean age of all HCWs was  $33.2 \pm 7.1$  years. More than half (58.3%, 1401/2402) of the participants were married/co-habiting and 92% (2215/2402) of the HCWs had some form of tertiary education. Nurses formed the majority (61.6%, 1484/2402) of study participants. Comorbid conditions occurred in 6% (149/2402) of HCWs. The proportion of cases who had comorbid conditions was double that of the controls (See [Table 2](#)).

### Community exposure to COVID-19 virus infection among HCWs

Approximately 26% (631/2402) of all HCWs had community exposure to COVID-19 Virus ([Table 2](#)).

Thirty percent (359/1201) of cases and 22.2% (266/1201) of controls had community exposure to COVID-19 virus infection ([Table 3](#)). Twenty six percent (625/2402) of HCWs lived in the same house with a confirmed COVID-19 person and 0.3% (7/2402) travelled together in close proximity with a confirmed COVID-19 patient in any kind of conveyance to the health facility ([Table 3](#)).

### Occupational-related exposure to COVID-19 virus infection among health care workers

Exposure to COVID-19 virus infection in health facilities occurred in 19% (451/2402) of health care workers.

Fifty-eight percent (1389/2402) of all health care workers indicated they had come into contact (within 1 meter) with a confirmed COVID-19 patient in the health facility. For those who came into contact with a confirmed COVID-19 patient, the risk factors identified were provision of direct care to the patient (aOR: 2.0, 95%CI: 1.36–2.9;  $p = <0.001$ ); face-to-face contact with the patient (aOR: 2.23, 95%CI: 1.41–3.51;  $p = <0.001$ ); performing aerosol generating procedures (AGP) for the patient (aOR: 2.73, 95%CI: 1.74–4.28;  $p = <0.001$ ) and having contact with materials/environment used by the patient (aOR: 2.73, 95%CI: 1.74–4.28;  $p = <0.001$ ). Provision of locum services was not an identified risk factor and was not statistically significant (aOR: 0.53, 95%CI: 0.26–1.07;  $p = <0.077$ ).

Table 2. Socio-demographic and clinical characteristics of health care workers in Ghana, 2020.

|                                            | Case<br>n(%)   | Control<br>n(%) | Total<br>n(%)  |
|--------------------------------------------|----------------|-----------------|----------------|
| <b>Region</b>                              |                |                 |                |
| High burden                                | 716(59.6)      | 701(58.4)       | 1417(59.0)     |
| Low burden                                 | 100(8.3)       | 100(8.3)        | 200(8.3)       |
| Medium burden                              | 385(32.1)      | 400(33.3)       | 785(32.7)      |
| <b>Sex</b>                                 |                |                 |                |
| Male                                       | 489(40.7)      | 495(41.2)       | 984(41.0)      |
| Female                                     | 712(59.3)      | 706(58.8)       | 1418(59.0)     |
| <b>Age</b>                                 |                |                 |                |
| (Mean $\pm$ SD)                            | 33.5 $\pm$ 7.5 | 32.8 $\pm$ 6.6  | 33.2 $\pm$ 7.1 |
| 20–29                                      | 398 (33.1)     | 421 (35.1)      | 819 (34.1)     |
| 30–39                                      | 610 (50.8)     | 625 (52)        | 1235 (51.4)    |
| 40–49                                      | 130 (10.8)     | 114 (9.5)       | 244 (10.2)     |
| 50–60                                      | 63 (5.3)       | 41 (3.4)        | 104 (4.3)      |
| <b>Marital Status</b>                      |                |                 |                |
| Never Married                              | 461(38.4)      | 504(42)         | 965(40.2)      |
| Married/Co-habiting                        | 719(59.9)      | 682(56.8)       | 1401(58.3)     |
| Ever Married                               | 21(1.8)        | 15(1.3)         | 36(1.5)        |
| <b>Religion</b>                            |                |                 |                |
| Christianity                               | 1098(91.4)     | 1097(91.3)      | 2195(91.4)     |
| Islam                                      | 101(8.4)       | 100(8.3)        | 201(8.4)       |
| Traditionalist                             | 0 (0)          | 4(0.3)          | 4 (0.2)        |
| Other                                      | 2 (0.2)        | 0 (0)           | 2 (0.1)        |
| <b>Educational Level</b>                   |                |                 |                |
| Up to Primary                              | 28(2.3)        | 38(3.2)         | 66(2.8)        |
| Secondary                                  | 55(4.6)        | 66(5.5)         | 121(5)         |
| Tertiary                                   | 1118(93.1)     | 1097(91.3)      | 2215(92.2)     |
| <b>Profession</b>                          |                |                 |                |
| Nurse                                      | 733 (61.0)     | 753 (62.7)      | 1484 (61.9)    |
| Doctor                                     | 140 (11.7)     | 66 (5.5)        | 206 (8.6)      |
| Paramedic/transport                        | 21 (1.8)       | 25 (2.1)        | 46 (1.9)       |
| Pharmacist                                 | 21 (1.8)       | 27 (2.3)        | 48 (2.0)       |
| Lab scientist/technic                      | 48 (4.0)       | 67 (5.6)        | 115 (4.8)      |
| Radiographer                               | 9 (0.7)        | 8 (0.7)         | 17 (0.7)       |
| Cleaner/Orderly                            | 35 (2.9)       | 69 (5.8)        | 104 (4.3)      |
| Others(specify)                            | 68 (5.7)       | 61 (5.1)        | 129 (5.4)      |
| Admin/ account staff                       | 104 (8.7)      | 109 (9.1)       | 212 (8.9)      |
| Disease control officer                    | 22 (1.8)       | 16 (1.3)        | 38 (1.6)       |
| <b>Comorbidity</b>                         |                |                 |                |
| No                                         | 1103(91.8)     | 1150(95.8)      | 2253(93.8)     |
| Yes                                        | 98(8.2)        | 51(4.3)         | 149(6.2)       |
| <b>Number of comorbidities<sup>‡</sup></b> |                |                 |                |
| One                                        | 88(89.8)       | 47(92.2)        | 135(90.6)      |
| Two*                                       | 10(10.2)       | 4(7.8)          | 14(9.4)        |
| <b>Hypertension<sup>‡</sup></b>            |                |                 |                |
| No                                         | 50(51)         | 30(58.8)        | 80(53.7)       |
| Yes                                        | 48(49)         | 21(41.2)        | 69(46.3)       |

(Continued)

Table 2. (Continued)

|                                        | Case     | Control  | Total     |
|----------------------------------------|----------|----------|-----------|
|                                        | n(%)     | n(%)     | n(%)      |
| <b>Diabetes</b>                        |          |          |           |
| No                                     | 81(82.7) | 42(82.4) | 123(82.6) |
| Yes                                    | 17(17.4) | 9(17.7)  | 26(17.5)  |
| <b>Kidney disease<sup>‡</sup></b>      |          |          |           |
| No                                     | 97(99)   | 50(98)   | 147(98.7) |
| Yes                                    | 1(1)     | 1(2)     | 2(1.3)    |
| <b>HIV<sup>‡</sup></b>                 |          |          |           |
| No                                     | 96(98)   | 51(100)  | 147(98.7) |
| Yes                                    | 2(2)     | 0(0)     | 2(1.3)    |
| <b>Other Comorbidities<sup>‡</sup></b> |          |          |           |
| No                                     | 58(59.2) | 27(52.9) | 85(57.1)  |
| Yes                                    | 40(40.8) | 24(47.1) | 64(42.9)  |

n: Frequency, %: Column Percentage, SD: Standard Deviation, uOR: Unadjusted Odds Ratio, Other Comorbidities conditions included ulcer, asthma, sickle cell, Rheumatoid Arthritis

<sup>‡</sup>: Applicable to only those with comorbid conditions

\*: combinations included: Hypertension & Diabetes (n = 9), Hypertension & HIV (n = 1), Hypertension & Kidney disease (n = 1) hypertension & ulcer (n = 1), hypertension & sickle cell (n = 1)

<https://doi.org/10.1371/journal.pone.0288242.t002>

### Risk categorization for COVID-19 virus infection among health care workers in Ghana

Complete data on adherence to IPC measures/protocols during a healthcare interaction with any patient was available for 1745 health care workers. The proportion of health workers who were at high risk of COVID-19 infection in providing care to patients was 87.4% (1525/1745).

Table 3. Community exposure to COVID-19 Virus among health care workers in Ghana, 2020.

|                                                                                                                              | Case       | Control    | Total      | Binary logistic regression |            |         |
|------------------------------------------------------------------------------------------------------------------------------|------------|------------|------------|----------------------------|------------|---------|
|                                                                                                                              | n(%)       | n(%)       | n(%)       | UOR                        | 95% CI     | P-value |
| <b>Staying in same house COVID-19 person</b>                                                                                 |            |            |            |                            |            |         |
| No                                                                                                                           | 842(70.1)  | 935(77.9)  | 1777(74.0) | 1.00                       |            |         |
| Yes                                                                                                                          | 359(29.9)  | 266(22.2)  | 625(26.0)  | 1.50                       | 1.25–1.8   | <0.001  |
| <b>Relationship with positive COVID-19 patient<sup>#</sup></b>                                                               |            |            |            |                            |            |         |
| Parent/Sibling                                                                                                               | 5 (1.4)    | 6 (2.3)    | 11 (1.8)   | 1.00                       |            |         |
| Spouse/Children                                                                                                              | 12 (3.4)   | 8 (3)      | 20 (3.2)   | 1.80                       | 0.41–7.95  | 0.438   |
| Auntie/Uncle                                                                                                                 | 3 (0.8)    | 1 (0.4)    | 4 (0.6)    | 3.60                       | 0.28–46.36 | 0.326   |
| Patient                                                                                                                      | 241 (67.3) | 130 (48.7) | 371 (59.4) | 2.22                       | 0.67–7.42  | 0.194   |
| Colleague worker                                                                                                             | 69 (19.3)  | 99 (37.1)  | 168 (26.9) | 0.84                       | 0.25–2.85  | 0.775   |
| other <sup>‡</sup>                                                                                                           | 28 (7.8)   | 23 (8.7)   | 51 (8.1)   | 1.46                       | 0.39–5.41  | 0.570   |
| <b>HCW have history of traveling together in close proximity with a confirmed COVID-19 patient in any kind of conveyance</b> |            |            |            |                            |            |         |
| No                                                                                                                           | 1200(99.9) | 1195(99.5) | 2395(99.7) | 1.00                       |            |         |
| Yes                                                                                                                          | 1(0.1)     | 6(0.5)     | 7(0.3)     | 0.17                       | 0.02–1.38  | 0.097   |

other<sup>‡</sup> includes boyfriend, driver, housemate/neighbor among others

<sup>#</sup>: Applicable to only persons who stayed in the same house with a COVID-19 person.

<https://doi.org/10.1371/journal.pone.0288242.t003>



## Adherence to infection prevention and control and PPE use during patient interactions

On assessment of Infection Prevention and Control (IPC) activities, not performing hand hygiene before and after any clean or aseptic procedure (aOR: 1.6, 95%CI: 1.05–2.45;  $p = 0.03$ ) and not frequently decontaminating high-touch surfaces (aOR: 2.31, 95%CI: 1.65–3.22;  $p = 0.001$ ) always as recommended were significant predictors of having COVID-19 infection.

During HCW interaction with patients, the use of PPEs as recommended in guidelines among HCWs were medical mask 47.6% (831/1745) face shield/goggles/protective glasses 20.5% (358/1745) and disposable gown 29.4% (513/1745) (Table 4). The proportion of controls that always used face shield/goggles/protective glasses as recommended was 7.3% more than the cases. Only 41.8% (343/820) of controls compared to 35.7% (330/925) of cases always replaced PPE as recommended but associations were not statistically significant (Table 4).

The proportion of controls that always performed hand hygiene before and after any clean or aseptic procedure as was 5.4% more than the cases. The odds of being infected with COVID-19 was 1.6 times higher among HCWs who did not always perform hand hygiene before and after any clean or aseptic procedure compared to those who always did (95% CI: 1.05–2.45,  $p = 0.023$ ). The odds of being infected with COVID-19 was 2.3 times higher among

**Table 4. PPE use and adherence to infection prevention and control measures among HCWs during health care interactions with patients in Ghana, 2020.**

|                                                                                           | Control       | Case          | Total          | Adjusted Logistic Regression |         |
|-------------------------------------------------------------------------------------------|---------------|---------------|----------------|------------------------------|---------|
|                                                                                           | N = 820 n (%) | N = 925 n (%) | N = 1745 n (%) | aOR (95% CI)                 | P-value |
| <b>Medical mask use</b>                                                                   |               |               |                |                              |         |
| Always as recommended                                                                     | 401 (48.90)   | 430 (46.49)   | 831 (47.62)    | 1                            |         |
| Not always as recommended                                                                 | 419 (51.10)   | 495 (53.51)   | 914 (52.38)    | 1.0(0.72–1.41)               | 0.986   |
| <b>Face shield or goggles/protective glasses use</b>                                      |               |               |                |                              |         |
| Always as recommended                                                                     | 200 (24.39)   | 158 (17.08)   | 358 (20.52)    | 1                            |         |
| Not always as recommended                                                                 | 620 (75.61)   | 767 (82.92)   | 1387 (79.48)   | 1.31(0.92–1.88)              | 0.138   |
| <b>Disposable gown use</b>                                                                |               |               |                |                              |         |
| Always as recommended                                                                     | 272 (33.17)   | 241 (26.05)   | 513 (29.40)    | 1                            |         |
| Not always as recommended                                                                 | 548 (66.83)   | 684 (73.95)   | 1232 (70.60)   | 1.07(0.74–1.55)              | 0.728   |
| <b>Replaced your PPE according to protocol use</b>                                        |               |               |                |                              |         |
| Always as recommended                                                                     | 343 (41.83)   | 330 (35.68)   | 673 (38.57)    | 1                            |         |
| Not always as recommended                                                                 | 477 (58.17)   | 595 (64.32)   | 1072 (61.43)   | 1.21(0.91–1.6)               | 0.188   |
| <b>Perform hand hygiene before and after any clean or aseptic procedure was performed</b> |               |               |                |                              |         |
| Always as recommended                                                                     | 383 (46.71)   | 382 (41.30)   | 765 (43.84)    | 1                            |         |
| Not always as recommended                                                                 | 437 (53.29)   | 543 (58.70)   | 980 (56.16)    | 1.60(1.05–2.45)              | 0.030   |
| <b>Perform hand hygiene after exposure to body fluid</b>                                  |               |               |                |                              |         |
| Always as recommended                                                                     | 386 (47.07)   | 404 (43.68)   | 790 (45.27)    | 1                            |         |
| Not always as recommended                                                                 | 434 (52.93)   | 521 (56.32)   | 955 (54.73)    | 0.94(0.63–1.39)              | 0.752   |
| <b>Perform hand hygiene after touching patient's surroundings</b>                         |               |               |                |                              |         |
| Always as recommended                                                                     | 279 (34.02)   | 260 (28.11)   | 539 (30.89)    | 1                            |         |
| Not always as recommended                                                                 | 541 (65.98)   | 665 (71.89)   | 1206 (69.11)   | 0.84(0.58–1.23)              | 0.371   |
| <b>High-touch surfaces decontaminated frequently</b>                                      |               |               |                |                              |         |
| Always as recommended                                                                     | 233 (28.41)   | 156 (16.86)   | 389 (22.29)    | 1                            |         |
| Not always as recommended                                                                 | 587 (71.59)   | 769 (83.14)   | 1356 (77.71)   | 2.31(1.65–3.22)              | 0.001   |

n: Frequency, %: Column Percentage, SD: Standard Deviation, aOR: adjusted Odds Ratio

<https://doi.org/10.1371/journal.pone.0288242.t004>



HCWs who did not always frequently decontaminate high-touch surfaces compared to those who always did (95% CI: 1.56–2.46,  $p = <0.001$ ) (Table 4).

### COVID -19 symptoms and duration

In assessing the symptoms exhibited by cases, headache was the predominant (44.7%, 537/1201) reported symptom and lasted for a median of 5 days (Table 5). About one-third of the cases lost their sense of smell (34.4%, 413/1201) with a similar proportion experiencing fatigue (34.1%, 410/1201). The two symptoms each lasted for a median duration of 5 days (Table 5). Fever was experienced by a quarter (26.7%, 321/1201) of the health workers with COVID-19 infection during the period under study (Fig 1).

About a third (34.3%, 412/1201) of the health care workers with COVID-19 infection were asymptomatic while another third (39.2%, 471) of them showed at most four symptoms (Fig 2).

### Clinical care received and outcome

More than three-quarters (89.7%,  $n = 1077$ ) of the health workers self-isolated at home after contracting COVID-19 whilst 9.3% (112/1201) had in-patient quarantine. Only 1% (12/1201) of infected HCWs required admission. Out of those who required admission, 0.4% (5/12) of them were admitted to the intensive care unit (ICU). About nine out of every ten (93%,  $n = 1121$ ) selected health worker who contracted COVID-19 was discharged without any immediate complications.

**Table 5. COVID -19 symptoms and duration among infected health care workers in Ghana, 2020.**

|                | Case<br>n(%) | Duration in days<br>Median (LQ, UQ) |
|----------------|--------------|-------------------------------------|
| Headache       | 537(44.7)    | 5(3, 7)                             |
| Loss Smell     | 413(34.4)    | 5(4, 10)                            |
| Fatigue        | 410(34.1)    | 5(4, 7)                             |
| Fever          | 321(26.7)    | 5(3, 7)                             |
| Cough          | 320(26.6)    | 5(3, 7)                             |
| Runny Nose     | 263(21.9)    | 5(3, 7)                             |
| Sore Throat    | 258(21.5)    | 5(3, 7)                             |
| Joint Pain     | 177(14.7)    | 5(3, 7)                             |
| Muscle Aches   | 166(13.8)    | 5(3, 7)                             |
| Chest Pain     | 156(13)      | 5(3, 7.5)                           |
| Short Breath   | 123(10.2)    | 4(3, 8)                             |
| Diarrhoea      | 99(8.2)      | 4(2, 5)                             |
| Nausea         | 82(6.8)      | 3(2, 5)                             |
| Abd Pain       | 43(3.6)      | 4(3, 7)                             |
| Ear Pain       | 29(2.4)      | 3(3, 7)                             |
| Wheezing       | 29(2.4)      | 7(4, 7)                             |
| Dark Urine     | 27(2.3)      | 4(3, 7)                             |
| Confusion      | 23(1.9)      | 7(3, 14)                            |
| Dark Stool     | 12(1)        | 3(3, 6)                             |
| Haemoptysis    | 5(0.4)       | 2(1, 2)                             |
| Seizures       | 5(0.4)       | 2(2, 2)                             |
| Aggressiveness | 4(0.3)       | 7(3, 19)                            |

n: Frequency, %: Column Percentage, LQ: Lower quartile, UQ: Upper quartile

<https://doi.org/10.1371/journal.pone.0288242.t005>

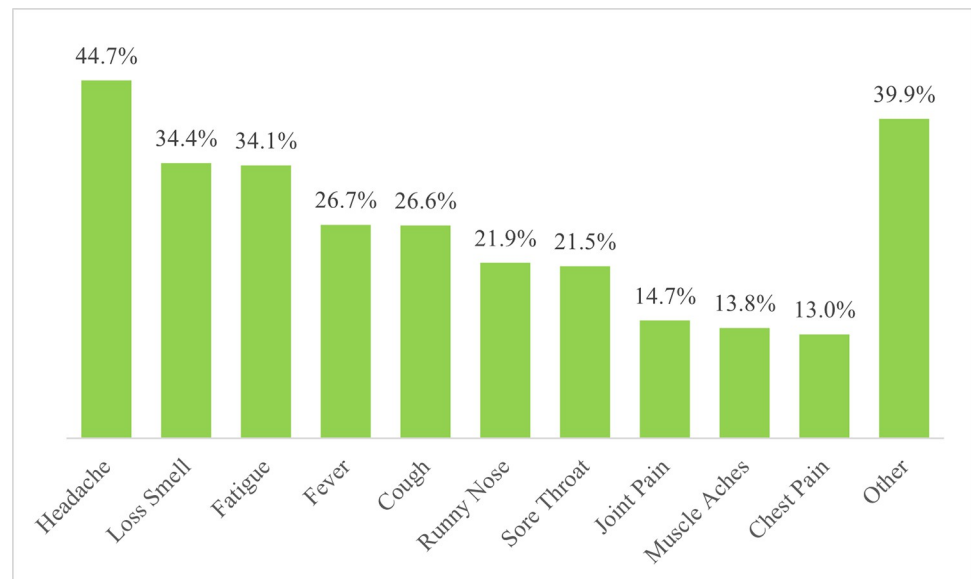

**Fig 1. Top ten symptoms among health care workers infected with COVID-19 in Ghana.**

<https://doi.org/10.1371/journal.pone.0288242.g001>

### **Association between host-related characteristics, community exposure, health facility exposure risks and COVID-19 infection among health care workers in selected regions of Ghana**

Profession of respondents, previous contact with a confirmed COVID-19 patient, staying in the same house with COVID-19 patient and having co-morbid conditions were significantly associated with COVID status of respondents. The odds of contracting COVID-19 infection were 2.1 times higher among medical doctors compared to nurses (aOR: 2.12, 95%CI:1.54–2.93) (Table 6). The Cleaner/Orderly had 59% reduced odds of contracting COVID-19 infection compared to nurses (aOR: 0.41, 95%CI: 0.23–0.73). Getting into contact with a confirmed

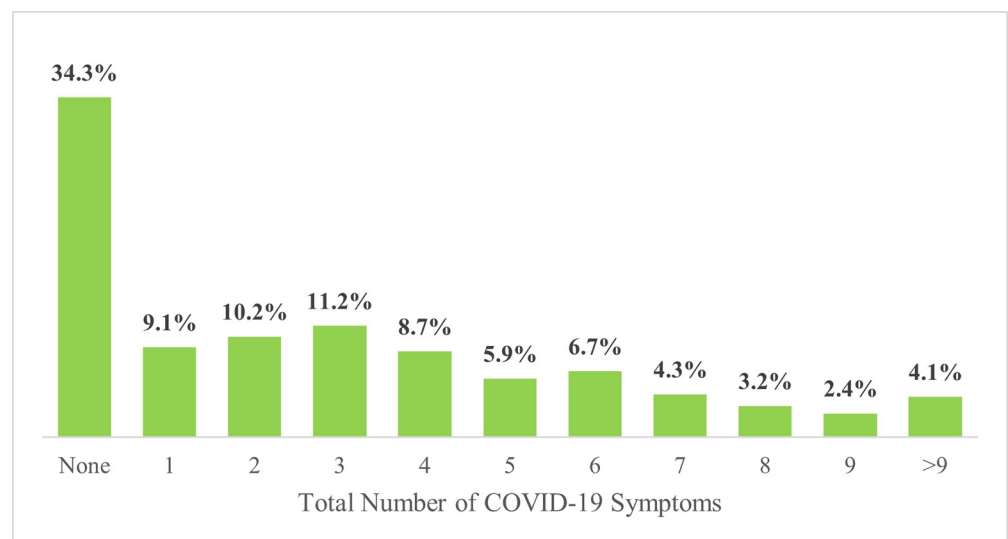

**Fig 2. Number of COVID-19 symptoms experienced by health care workers infected with COVID-19 in Ghana.**

<https://doi.org/10.1371/journal.pone.0288242.g002>

**Table 6. Association between COVID-19 infection and host-related characteristics, community exposure, health facility exposure risks among health workers in Ghana, 2020.**

|                                           |      | Binary Logistic regression |         |
|-------------------------------------------|------|----------------------------|---------|
|                                           | n    | aOR(95% CI)                | P-value |
| Profession                                |      |                            |         |
| Nurse                                     | 1484 | 1.00                       |         |
| Doctor                                    | 206  | 2.12 (1.54–2.93)           | 0.001   |
| Paramedic/transport                       | 46   | 0.79 (0.42–1.47)           | 0.454   |
| Pharmacist                                | 48   | 0.86 (0.48–1.56)           | 0.627   |
| Lab scientist/technician                  | 115  | 0.78 (0.52–1.16)           | 0.221   |
| Radiographer                              | 17   | 1.16 (0.44–3.08)           | 0.768   |
| Cleaner/Orderly                           | 104  | 0.41 (0.23–0.73)           | 0.003   |
| Others(specify)                           | 129  | 1.06 (0.72–1.58)           | 0.761   |
| Admin/ account staff                      | 212  | 1.04 (0.77–1.4)            | 0.808   |
| Disease control officer                   | 38   | 1.41 (0.72–2.79)           | 0.317   |
| Contact with a confirmed COVID-19 patient |      |                            |         |
| No                                        | 1013 | 1.00                       |         |
| Yes                                       | 1389 | 1.39 (1.15–1.67)           | 0.001   |
| Comorbidity                               |      |                            |         |
| No                                        | 1777 | 1.00                       |         |
| Yes                                       | 625  | 1.90 (1.29–2.78)           | 0.001   |
| Community exposure                        |      |                            |         |
| Unexposed                                 | 1771 | 1.00                       |         |
| Exposed                                   | 631  | 1.28 (1.03–1.59)           | 0.027   |
| Health related risk                       |      |                            |         |
| Low risk                                  | 102  | 1.00                       |         |
| High risk                                 | 2300 | 1.08 (0.7–1.68)            | 0.716   |

n: Frequency, aOR: Adjusted Odds Ratio, CI: Confidence Interval

<https://doi.org/10.1371/journal.pone.0288242.t006>

COVID-19 patient was associated with 39% increased odds of getting infected with COVID-19. The odds of contracting COVID-19 infection was 90% more among health workers with comorbid conditions than those without such conditions (aOR: 1.90, 95%CI: 1.29–2.78). With regards to community exposure, health workers who were exposed had 0.28 higher odds of contracting COVID -19 compared to those who were not exposed (aOR: 1.28, 95%CI: 1.03–1.59) (Table 6).

### Association between clinical outcome of COVID-19 infection and host-related characteristics, community exposure, health facility exposure risks and among health workers in selected regions of Ghana

Having a comorbidity was the only significant predictor of clinical outcome of COVID-19 infection.

The odds of being discharged with complication among health works with comorbidity was 2.5 times higher than those without any comorbidity (aOR: 2.48, 95%CI: 1.16–5.30).

## Discussion

This study provides some insight into the epidemiology of COVID-19 infection among HCWs during the first two phases of the pandemic in Ghana. An increased risk of infection was

associated with non-adherence to IPC protocols. The study revealed that 26.3% and 18.8% of HCWs had community and health system/occupational-related exposure to the COVID-19 virus respectively. Almost 87% of HCWs had high risk for COVID-19 infection due to non-adherence to strict IPC measures. Only 29.4% and 47.6% of HCWs used face shields/goggles and medical mask respectively as recommended always during patient interactions in work environment. For HCWs with COVID-19 infection, majority (61%) were nurses. Headache and loss of smell were the predominant symptoms among COVID-19 infected HCWs. Only 1% of HCWs with COVID-19 infection required admission to the hospital with 40% of those admitted requiring ICU admissions.

The HCWs in this study were generally a young population with a mean age of 33.2 years with 59% being female. This is expected as nurses made up the largest health care force in the country and majority were female.

Nurses formed the majority (61%) of HCWs infected with COVID-19 from our study. This finding was consistent with results from a systematic review of databases undertaken till May 2020 where COVID-19 infections were mainly in nurses (38.6%) [6]. Similarly, nurses formed the majority of COVID infected cadre of HCWs in Wuhan (52.1%) and Iran (51.3%) [25, 26]. In the set-up of our healthcare system, the nurses are usually the commonest cadre of HCWs to interact with patients in out-patient engagement, in-patient care, drug administration and performing procedures which increases their exposure risk to infection [27–29]. These reasons likely contributed to the differential effects of occupation types in infection status as shown in all the studies with the nurses being most affected.

Compared to nurses, doctors and cleaners had significant higher odds of getting COVID-19 infection. This may be due to the nature of their work encountering patients in closed spaces or proximity which increases their risk of acquiring the infection. In relation to disease control officers, they may have been exposed during cleaning and dusting activities on exposed surfaces.

The prevalence of co-morbidities among the HCWs in our study was 6.2% with hypertension being the commonest co-morbidity. This was low compared to reports of co-morbid prevalence of 18.4% from a systematic and meta-analysis of seven studies by Gholami et al. [30] and 38% reported among HCWs in United States [31] although hypertension was also the common reported co-morbidity by Gholami et al. Our study participants were mostly young as indicated by their mean age which could be the reason for the lower rate of comorbidities among HCWs.

Our study revealed low occupational exposure to COVID-19 virus with a rate of 18.8%. This is in contrast to other studies in Ghana and the United States where the level of occupational exposure was reported to be 80.4% and 55% respectively [31, 32]. Compared to the other study in Ghana, the high occupational exposure reported was as a result of the study being conducted in a designated COVID-19 treatment center where all patients were infected and therefore the exposure was high. The differences in the low rate of occupational exposure compared to that of US is likely due to the low prevalence of the COVID-19 infection in Ghana and Africa in general compared to the US. Although occupational exposure risk was low among our participants, COVID-19 infection risk still exists as the pandemic persists with newer, more virulent and easily transmissible variants.

Our study also revealed that 87.4% of all HCWs were at risk of COVID-19 infection as they did not comply with PPE usage as always recommended during health care interactions with patients in the health facilities. This was similar to findings by Opoku et al. [21] where PPE use was among only 59.5% of HCWs. However, our study finding was in contrast to the previous study by Ashinyo et al. [32] in Ghana where only 14% of HCWs were at high risk of COVID-19 infection. The difference in risk may be due to availability of PPEs as well as increased

compliance in the treatment center as HCWs in those centers were aware they were dealing with infected patients. This brings to the fore the point that HCWs need to apply standard appropriate PPEs to every encounter and upscale as the condition demands. In the era of a pandemic, to treat every patient with the same precautions they will use when treating COVID-19 infected patients. The study did not identify PPE shortages as a risk and this could be due to the fact that the pandemic has gone through a second wave and most countries had largely addressed the issue of inadequate supplies.

Compliance to IPC measures during the pandemic was low among our participants with less than 50% compliance with hand hygiene practices during patient interactions, before or after performing procedures, and using PPEs as always recommended. Afeng-Nkansah et al. and Alah et al. reported similar findings where only 44.1% and 50% respectively of HCWs were fully compliant with IPC measures (PPE usage and hand hygiene). Another study by Ashinyo et al. [33] reported 97.5% for hand hygiene and PPE usage among HCWs in Ghana. The contrasting findings by Ashinyo et al. can be attributed to the setting of their study which were designated COVID-19 treatment centers where availability of IPC materials, training of staff on IPC measures as well as monitoring of IPC adherence will be ensured. In addition, HCWs in the treatment centers will make conscious efforts to adhere to IPC measures knowing the risk as they provide care to confirmed COVID-19 patients. For this risk to be mitigated, compliance of HCWs to IPC measures as well as availability of PPEs needs to be ensured by hospital authorities.

This demonstrates that HCWs in non-COVID treatment health facilities will need support in terms of refresher trainings on IPC together with behavior change interventions to mitigate the risk of COVID-19 infection.

Almost 34% of HCWs in our study were asymptomatic. Similarly, 35.5% of infected HCWs were reported to be asymptomatic in a study by Sabetian et al. in 2020 [25]. The predominant symptoms among symptomatic HCWs in our study were headache (44.7%) and loss of smell (34.4%), both lasting a median of 5 days. Previous studies in Iran [25] reported myalgia (46%) and cough (45.5%) as the predominant symptoms whilst reports from systematic review from Gholami et al. reported fever (27.5%) and cough (26.1%) as the predominant symptoms [30]. The numbers of asymptomatic patients endorse the time held public health responses of physical distancing and masking to break the transmission cycle. Also, symptoms vary but for our setting, headache and loss of smell were considered key in our suspicion of COVID-19 infection when interacting with patients. However, anosmia is currently not a major symptom of the Omicron variant due to the changing trend in symptomatology since the beginning of the pandemic [34]. It is crucial for public health surveillance team to frequently review data for change in trends and continuously engage and update decision makers to ensure timely information sharing and action taking in our response to the pandemic.

Only 12 (1%) HCWs in our study were admitted to the hospital out of which 5 (41%) were admitted into the ICU. This admission rate was lower than a previous study from Iran (5.5%) with no ICU admissions and US (10%) with some ICU admissions [25, 31]. Gholami et al. also reported a hospitalization rate of 15.1% in systematic review of 13 studies [30]. Similar high hospitalization and ICU admission rates in China in the early stages of the pandemic in 2020 [35, 36]. Majority (93%) of our patients who were admitted were discharged home without any complications. The low hospitalization rate among our study participants may be attributed to the younger population of our study participants, the lower numbers of existing co-morbidities among our participants and the low prevalence in sub-Saharan Africa in general. In the early stage of the pandemic, the aged and those with co-morbidities formed a significant part of hospitalization. Thus, majority of our participants did not experience severe forms of the disease.

Beyond COVID-19, strengthening the health system to ensure robust IPC practices in health care facilities will serve overall to benefit not only HCWs but also patients and visitors through reduction in health care associated infections [37].

Though this study is representative as it spanned the 3 major regions in the country, there were some limitations. The case-control approach of the study may have resulted in recall bias that may affect responses received from participants thereby urging caution in interpreting findings. Another limitation is that the study did not evaluate the support available to HCWs for risk mitigation such as trainings and safety of HCWs.

## Conclusion

There was high occupational exposure to COVID-19 virus among HCWs in health facilities. Doctors and cleaners were at more risk of exposure compared to nurses. Activities such as aerosol generating procedures, provision of direct care, face-to-face contact as well as contact with environment or materials used by patients with COVID-19 were key risks for exposure. Non-adherence to IPC guidelines puts HCWs at increased risk of COVID-19 infection.

To minimize the risk of COVID-19 infection and also protect the HCW, health institutions need to ensure robust IPC practices in facilities, ensure consistent supply of needed PPEs and implementation of hand hygiene measures. Effective monitoring and supervision of IPC implementation measures should be instituted to minimize risk of COVID-19 transmission to ensure a healthy and effective workforce.

## Supporting information

**S1 Data.**  
(XLS)

## Acknowledgments

The authors acknowledge support from WHO Ghana Office to the University of Ghana Medical and Public Health Schools to carry out the study. They also acknowledge WHO for the study methodology and the interview instruments which were modified slightly.

We also acknowledge all field staff and supervisors, the KATH IRB and research office. Special thanks go to Miss Sonia Cobbold for all her assistance.

## Author Contributions

**Conceptualization:** Margaret Lartey, Ernest Kenu.

**Data curation:** Vincent Jessey Ganu.

**Formal analysis:** Margaret Lartey, Ernest Kenu, Vincent Jessey Ganu.

**Funding acquisition:** Margaret Lartey, Alfred Yawson.

**Methodology:** Margaret Lartey, Ernest Kenu, Vincent Jessey Ganu.

**Supervision:** Margaret Lartey, Ernest Kenu, Vincent Jessey Ganu, Franklin Asiedu-Bekoe, Baafour Kofi Opoku, Alfred Yawson, Sally-Ann Ohene.

**Writing – original draft:** Margaret Lartey, Ernest Kenu, Vincent Jessey Ganu, Franklin Asiedu-Bekoe, Baafour Kofi Opoku, Alfred Yawson, Sally-Ann Ohene.

**Writing – review & editing:** Margaret Lartey, Ernest Kenu, Vincent Jessey Ganu, Franklin Asiedu-Bekoe, Baafour Kofi Opoku, Alfred Yawson, Sally-Ann Ohene.



## References

1. WHO Director-General's opening remarks at the media briefing on COVID-19—11 March 2020 [Internet]. 2020 [cited 2020 Apr 25]. Available from: <https://www.who.int/dg/speeches/detail/who-director-general-s-opening-remarks-at-the-media-briefing-on-covid-19—11-march-2020>
2. A second COVID-19 case is confirmed in Africa | WHO | Regional Office for Africa [Internet]. 2020 [cited 2020 Apr 25]. Available from: <https://www.afro.who.int/news/second-covid-19-case-confirmed-africa>
3. Coronavirus: Nigeria confirms first case in sub-Saharan Africa—BBC News [Internet]. 2020. [cited 2020 Apr 25]. Available from: <https://www.bbc.com/news/world-africa-51671834>
4. WHO. WHO Coronavirus (COVID-19) Dashboard | WHO Coronavirus (COVID-19) Dashboard With Vaccination Data [Internet]. 2023 [cited 2023 June 7]. Available from: <https://covid19.who.int/>
5. WHO AFRO. Weekly bulletin on outbreaks and other emergencies [Internet]. 2021 [cited 2021 Aug 10].
6. Bandyopadhyay S, Baticulon RE, Kadhum M, Alser M, Ojuka DK, Badereddin Y, et al. 2020. Infection and mortality of healthcare workers worldwide from COVID-19: A systematic review [Internet]. Vol. 5, BMJ Global Health. BMJ Publishing Group; 2020 [cited 2021 Mar 21]. p. 3097. Available from: <https://doi.org/10.1136/bmjgh-2020-003097> PMID: 33277297
7. South African union concerned about surging COVID-19 infections in healthcare workers | News Ghana [Internet]. [cited 2020 Apr 26]. Available from: <https://newsghana.com.gh/south-african-union-concerned-about-surging-covid-19-infections-in-healthcare-workers/>
8. Nguyen LH, Drew DA, Graham MS, Joshi AD, Guo CG, Ma W, et al. Risk of COVID-19 among front-line health-care workers and the general community: a prospective cohort study. *Lancet Public Heal*. 2020 Sep 1; 5(9):e475–83. [https://doi.org/10.1016/S2468-2667\(20\)30164-X](https://doi.org/10.1016/S2468-2667(20)30164-X) PMID: 32745512
9. Chou R, Dana T, Buckley DI, Selph S, Fu R, Totten AM. Epidemiology of and Risk Factors for Coronavirus Infection in Health Care Workers: A Living Rapid Review [Internet]. Vol. 173, *Annals of internal medicine*. NLM (Medline); 2020 [cited 2021 Aug 10]. p. 120–36. Available from: <https://www.acpjournals.org/doi/abs/https://doi.org/10.7326/M20-1632> PMID: 32369541
10. Al-Kuwari MG, AbdulMalik MA, Al-Nuaimi AA, Abdulmajeed J, Al-Romaihi HE, Semaan S, et al. Epidemiology Characteristics of COVID-19 Infection Amongst Primary Health Care Workers in Qatar: March–October 2020. *Front Public Heal* [Internet]. 2021 May 20 [cited 2021 Aug 10]; 9:570. Available from: <https://www.frontiersin.org/articles/10.3389/fpubh.2021.679254/full> PMID: 34095077
11. Alajmi J, Jeremijenko AM, Abraham JC, Alishaq M, Concepcion EG, Butt AA, et al. COVID-19 infection among healthcare workers in a national healthcare system: The Qatar experience. *Int J Infect Dis* [Internet]. 2020 Nov 1 [cited 2021 Aug 10]; 100:386–9. Available from: <https://doi.org/10.1016/j.ijid.2020.09.027> PMID: 32949777
12. WHO AFRO. Weekly Bulletin on outbreaks and other emergencies. 2022.
13. Exclusive: deaths of NHS staff from covid-19 analysed | Comment | Health Service Journal [Internet]. [cited 2020 Apr 25]. Available from: <https://www.hsj.co.uk/exclusive-deaths-of-nhis-staff-from-covid-19-analysed/7027471.article>
14. Spain: COVID-19 cases over 100,000, deaths reach 9,053 [Internet]. [cited 2020 May 2]. Available from: <https://www.aa.com.tr/en/europe/spain-covid-19-cases-over-100-000-deaths-reach-9-053/1787728#>
15. CDC: Nearly 10,000 Health Care Workers Had COVID-19 | National News | US News [Internet]. [cited 2020 May 2]. Available from: <https://www.usnews.com/news/national-news/articles/2020-04-14/cdc-nearly-10-000-health-care-workers-had-covid-19>
16. Why More Health Workers are Getting COVID-19 in Spain: Doctor | Time [Internet]. [cited 2020 Apr 25]. Available from: <https://time.com/5813848/spain-coronavirus-outbreak-doctor/>
17. Chang D, Xu H, Rebaza A, Sharma L, Dela Cruz CS. Protecting health-care workers from subclinical coronavirus infection. Vol. 8, *The Lancet Respiratory Medicine*. Lancet Publishing Group; 2020. p. e13. [https://doi.org/10.1016/S2213-2600\(20\)30066-7](https://doi.org/10.1016/S2213-2600(20)30066-7) PMID: 32061333
18. Wang J, Liu F, Tan JBX, Harbarth S, Pittet D, Zingg W. Implementation of infection prevention and control in acute care hospitals in Mainland China—A systematic review. Vol. 8, *Antimicrobial Resistance and Infection Control*. BioMed Central Ltd.; 2019. <https://doi.org/10.1186/s13756-019-0481-y> PMID: 30792854
19. Mhango M, Dzobo M, Chitungo I, Dzinamarira T. COVID-19 Risk Factors Among Health Workers: A Rapid Review. Vol. 11, *Safety and Health at Work*. Elsevier B.V.; 2020. p. 262–5. <https://doi.org/10.1016/j.shaw.2020.06.001> PMID: 32995051
20. Hoe GAN W, Wah LIM J, KOH D. Preventing intra-hospital infection and transmission of COVID-19 in healthcare workers. *Saf Health Work*. 2020 Mar;



21. Opoku MM, Asante KP, Gyaase S, Teviu EA, Amponsah K, Twum A, et al. Risk factors for COVID-19 virus infection among health workers: A case-control study in the Bono East Region of Ghana. *Am J Infect Control*. 2022 Aug 12; <https://doi.org/10.1016/j.ajic.2022.08.008> PMID: 35970420
22. WHO. Health Workers: a global profile. Geneva, Switzerland; 2006.
23. WHO. SURVEY TOOL AND GUIDANCE Rapid, simple, flexible behavioural insights on COVID-19 [Internet]. 2020 [cited 2020 Aug 2]. Available from: <http://www.euro.who.int/pubrequest>
24. WHO. Risk assessment and management of exposure of health care workers in the context of COVID-19: interim guidance, 19 March 2020. World Health Organization. [Internet]. 2020. p. License: CC BY-NC-SA 3.0 IGO. Available from: <https://apps.who.int/iris/handle/10665/331496>.
25. Sabetian G, Moghadami M, Hashemizadeh Fard Haghighi L, Shahriarirad R, Fallahi MJ, Asmarian N, et al. COVID-19 infection among healthcare workers: a cross-sectional study in southwest Iran. *Virol J* [Internet]. 2021 Dec 1 [cited 2022 Jan 31]; 18(1):1–8. Available from: <https://virologyj.biomedcentral.com/articles/10.1186/s12985-021-01532-0>
26. Zheng L, Wang X, Zhou C, Liu Q, Li S, Sun Q, et al. Analysis of the Infection Status of Healthcare Workers in Wuhan During the COVID-19 Outbreak: A Cross-sectional Study. *Clin Infect Dis* [Internet]. 2020 Nov 19 [cited 2022 Jan 31]; 71(16):2109–13. Available from: <https://academic.oup.com/cid/article/71/16/2109/5837357> <https://doi.org/10.1093/cid/ciaa588> PMID: 32409825
27. Shrestha GS. COVID-19 Pandemic: Shortage of Personal Protective Equipment, Use of Improvised Surrogates, and the Safety of Health Care Workers. *J Nepal Health Res Counc* [Internet]. 2020 Apr 20 [cited 2022 Jan 31]; 18(1):150. Available from: <https://pubmed.ncbi.nlm.nih.gov/32335614/> <https://doi.org/10.33314/jnhrc.v18i1.2593> PMID: 32335614
28. Ilesanmi OS, Afolabi AA, Akande A, Raji T, Mohammed A. Infection prevention and control during COVID-19 pandemic: realities from health care workers in a north central state in Nigeria. *Epidemiol Infect* [Internet]. 2021 [cited 2022 Jan 31]; 149. Available from: <https://pubmed.ncbi.nlm.nih.gov/33407965/>
29. Abed Alah M, Abdeen S, Selim N, Hamdani D, Radwan E, Sharaf N, et al. Compliance and barriers to the use of infection prevention and control measures among health care workers during COVID-19 pandemic in Qatar: A national survey. *J Nurs Manag* [Internet]. 2021 Nov 1 [cited 2022 Jan 31]; 29(8):2401–11. Available from: <https://pubmed.ncbi.nlm.nih.gov/34351012/> <https://doi.org/10.1111/jonm.13440> PMID: 34351012
30. Gholami M, Fawad I, Shadan S, Rowaiee R, Ghanem HA, Hassan Khamis A, et al. COVID-19 and healthcare workers: A systematic review and meta-analysis. *Int J Infect Dis* [Internet]. 2021 Mar 1 [cited 2022 Jan 31]; 104:335. Available from: <https://pubmed.ncbi.nlm.nih.gov/33444754/> <https://doi.org/10.1016/j.ijid.2021.01.013> PMID: 33444754
31. Team CC-19 R, Team CC-19 R, Burrer SL, Perio MA de, Hughes MM, Kuhar DT, et al. Characteristics of Health Care Personnel with COVID-19—United States, February 12–April 9, 2020. *Morb Mortal Wkly Rep* [Internet]. 2020 Apr 17 [cited 2022 Feb 1]; 69(15):477. Available from: <https://pubmed.ncbi.nlm.nih.gov/33444754/> <https://doi.org/10.1177/2150132720969483> PMID: 33213266
32. Ashinyo ME, Dubik SD, Duti V, Amegah KE, Ashinyo A, Larsen-Reindorf R, et al. Healthcare Workers Exposure Risk Assessment: A Survey among Frontline Workers in Designated COVID-19 Treatment Centers in Ghana. *J Prim Care Community Heal*. 2020;11. <https://doi.org/10.1177/2150132720969483> PMID: 33213266
33. Ashinyo M, Eyram, Dubik, Stephen D, Duti V, Amegah K, Ebenezer, et al. Infection prevention and control compliance among exposed healthcare workers in COVID-19 treatment centers in Ghana: A descriptive cross-sectional study. *PLoS One* [Internet]. 2021; 16(3):e0248282. Available from: <https://doi.org/10.1371/journal.pone.0248282> PMID: 33690699
34. Iacobucci G. Covid-19: Runny nose, headache, and fatigue are commonest symptoms of omicron, early data show. *BMJ* [Internet]. 2021 Dec 16 [cited 2022 Feb 12]; 375:n3103. Available from: <https://www.bmj.com/content/375/bmj.n3103> <https://doi.org/10.1136/bmj.n3103> PMID: 34916215
35. Li Q, Guan X, Wu P, Wang X, Zhou L, Tong Y, et al. Early Transmission Dynamics in Wuhan, China, of Novel Coronavirus-Infected Pneumonia. *N Engl J Med* [Internet]. 2020 Mar 26 [cited 2022 Feb 1]; 382(13):1199–207. Available from: <https://pubmed.ncbi.nlm.nih.gov/31995857/> <https://doi.org/10.1056/NEJMoa2001316> PMID: 31995857
36. Chu J, Yang N, Wei Y, Yue H, Zhang F, Zhao J, et al. Clinical characteristics of 54 medical staff with COVID-19: A retrospective study in a single center in Wuhan, China. *J Med Virol* [Internet]. 2020 Jul 1 [cited 2022 Feb 1]; 92(7):807–13. Available from: <https://pubmed.ncbi.nlm.nih.gov/32222986/> <https://doi.org/10.1002/jmv.25793> PMID: 32222986
37. WHO. Minimum requirements for infection prevention and control programmes [Internet]. 2019 [cited 2022 Apr 20]. Available from: <https://www.who.int/publications/item/9789241516945>
